# Supplementary material for: Progress in Predicting Ames Test Outcomes from Chemical Structures: An In-depth Re-evaluation of Models from the 1st and 2nd Ames/QSAR International Challenge Projects
Source: Preprints.org preprint supplement (doi:10.20944/preprints202401.0601.v1), 2024-01-08
Supplement: Supplementary file 1 [file supplementary]

## Sheet: table S1.
Project No	Phase	Team No	Teams	Tool No	QSAR tools (module)	BA (%)	MCC	F1 score (%)	PC1	COV (%)	Johnson Sb[COV (%)]	estimated BA_COV100%	estimated MCC_COV100%	estimated F1_COV100%	estimated PC1_COV100%
1	1	1	Lhasa Limited	1	Derek_Nexus v.4.0.5	72.5	0.39	48.9319	1.41918	100	0.157932	72.5	0.39	48.9319	1.41918
1	1	1	Lhasa Limited	2	Sarah Nexus v. 1.2 (model v.1.1.2)_1	66.6	0.28	39.611	-0.657236	80	-0.508069	62.8579	0.189364	32.2065	-2.22053
1	1	2	MultiCASE Inc	3	BM_PHARMA v1.5.2.0 (Statistical approach; SALM/ ECOLI consensus)	68.8	0.33	43.6131	0.214588	90.5	-0.411305	65.6016	0.252533	37.2844	-1.12157
1	1	2	MultiCASE Inc	4	GT_EXPERT v1.5.2.0 (Rule based)_1	72.4	0.34	44.6285	0.764558	91	-0.404698	69.2387	0.263432	38.3732	-0.556096
1	1	3	Leadscope Inc	5	Statistical-based (QSAR)	71	0.34	44.4753	0.593927	86	-0.460101	67.5274	0.255892	37.6042	-0.856772
1	1	3	Leadscope Inc	6	Rule-based (alerts)	69.6	0.31	41.7874	0.0408066	94.3	-0.350275	66.7445	0.240838	36.1373	-1.1521
1	1	4	Istituto di Ricerche Farmacologiche Mario Negri IRCCS	7	CAESAR (training set based on Katius et al.)_1	67.2	0.25	36.8805	-0.98566	99.6	-0.0640134	65.9529	0.219795	34.413	-1.50663
1	1	4	Istituto di Ricerche Farmacologiche Mario Negri IRCCS	8	SARPY (training set based on Katius et al.)_1	64.1	0.2	34.3809	-1.85039	99.6	-0.0640134	62.8529	0.169795	31.9133	-2.37136
1	1	5	LMC-Bourgas University	9	TIMES-AMES (in domain TIMES model)	68.9	0.37	47.7395	0.790439	14.5	-0.897352	62.9707	0.226387	36.0071	-1.68661
1	1	5	LMC-Bourgas University	10	TIMES-AMES (including out of domain)	63.7	0.22	35.0779	-1.71339	99.9	0.0522361	63.1061	0.205616	33.9028	-1.96149
1	1	6	Istituto Superiore di Sanita	11	ToxTree 2.6.6_1	66.7	0.24	36.8837	-1.10823	99.9	0.0522361	66.1061	0.225616	35.7086	-1.35633
1	1	7	Prous Institute	12	Symmetry S. typhimurium (Ames)_1	62.1	0.2	33.7112	-2.12704	99.9	0.0522361	61.5061	0.185616	32.5361	-2.37514
1	1	8	Swedish Toxicology Science Research Center	13	Swetox AZAMES_1	65.1	0.32	40.7261	-0.483319	97.1	-0.273015	62.6786	0.261352	35.9349	-1.49488
1	1	9	Fujitsu Kyushu Systems Limited	14	ADMEWORKS/Predictor Ames-V71_1	63.3	0.2	31.8331	-2.12738	57.7	-0.630124	58.8721	0.0927536	23.0716	-3.97717
1	1	10	IdeaConsult Ltd.	15	Ambit consensus model_1	64.9	0.27	38.4574	-1.00088	93.6	-0.36387	61.9681	0.198988	32.6561	-2.2257
1	1	11	Molecular Networks GmbH and Altamira LLC	16	ChemTune•ToxGPS Ames	70.9	0.33	43.8444	0.470654	90.3	-0.413862	67.6873	0.252185	37.4873	-0.871509
1	1	12	Simulations Plus, Inc	17	MUT_Risk-0_1	66.3	0.23	36.6245	-1.23856	83.6	-0.480923	62.7105	0.143058	29.5218	-2.73814
1	1	12	Simulations Plus, Inc	18	MUT_Risk-1	66.2	0.29	40.5487	-0.568531	83.6	-0.480923	62.6105	0.203058	33.4461	-2.06811
1	2	1	Lhasa Limited	19	Derek_Nexus v.4.2.0	72.2	0.42	51.1805	1.74662	100	0.157932	72.2	0.42	51.1805	1.74662
1	2	1	Lhasa Limited	20	Sarah Nexus v. 1.2 (model v.1.1.2)_2	67.1	0.32	42.2118	-0.147131	82.9	-0.486536	63.4789	0.232294	35.0467	-1.65988
1	2	1	Lhasa Limited	21	Sarah Nexus v. 2.0.1 (model v.1.1.19)	68.7	0.35	44.5846	0.405784	84.1	-0.476797	65.1336	0.26362	37.5278	-1.08411
1	2	1	Lhasa Limited	22	Sarah Nexus v. 2.0.1 (model v.1.1.19)+NIHS1	70.5	0.38	47.0553	0.988616	83.3	-0.483351	66.8968	0.292728	39.9256	-0.516658
1	2	2	MultiCASE Inc	23	BM_PHARMA v1.5.2.0 (Statistical approach; SALM/ECOLI consensus)	78.9	0.5	57.9193	3.52821	65.3	-0.593253	74.6793	0.397771	49.5678	1.76497
1	2	2	MultiCASE Inc	24	GT_EXPERT v1.5.2.0 (Rule based)_2	75.5	0.43	51.9744	2.24626	89.4	-0.424825	72.2257	0.350693	45.4954	0.878361
1	2	3	Leadscope Inc	25	Statistical-based QSAR (rebuild I)	76	0.46	54.2949	2.67006	90.7	-0.4087	72.8163	0.382887	47.9952	1.34002
1	2	3	Leadscope Inc	26	Rule-based (Alerts)	74.2	0.46	54.5243	2.48178	93.8	-0.360132	71.2891	0.389497	48.7646	1.26574
1	2	4	Istituto di Ricerche Farmacologiche Mario Negri IRCCS	27	CAESAR (training set based on Katius et al.)_2	71	0.32	42.7345	0.335219	99.9	0.0522361	70.4061	0.305616	41.5594	0.0871194
1	2	4	Istituto di Ricerche Farmacologiche Mario Negri IRCCS	28	SARPY (training set based on Katius et al. + Phase I)	68	0.35	44.9299	0.351245	97.7	-0.247182	65.7238	0.294868	40.4259	-0.599672
1	2	4	Istituto di Ricerche Farmacologiche Mario Negri IRCCS	29	KNN (training set based on Hansen et al. + Phase I)	65.5	0.31	41.1451	-0.473045	98.8	-0.176344	63.6218	0.264508	37.4287	-1.25769
1	2	5	LMC-Bourgas University	30	TIMES-AMES (In domain TIMES model)	72.3	0.47	54.3626	2.31943	18	-0.858216	66.5906	0.331713	43.0653	-0.0657558
1	2	5	LMC-Bourgas University	31	TIMES-AMES (Including out of domain)	65.7	0.27	39.2213	-0.854035	98	-0.231754	63.5105	0.216968	34.8888	-1.76874
1	2	6	Istituto Superiore di Sanita	32	ToxTree 2.6.6_2	68.7	0.3	41.3145	-0.162059	100	0.157932	68.7	0.3	41.3145	-0.162059
1	2	7	Prous Institute	33	Symmetry S. typhimurium (Ames)_2	73.9	0.41	50.7474	1.84279	99.9	0.0522361	73.3061	0.395616	49.5723	1.59469
1	2	8	Swedish Toxicology Science Research Center	34	Swetox AZAMES_2	74.7	0.49	56.3998	2.87312	93.1	-0.372768	71.7181	0.417777	50.4996	1.62742
1	2	9	Fujitsu Kyushu Systems Limited	35	ADMEWORKS/Predictor Ames-V71_2	67.4	0.31	45.8442	0.0861892	22.7	-0.817643	61.9185	0.177234	34.998	-2.20376
1	2	10	IdeaConsult Ltd.	36	Ambit consensus model_2	64	0.24	36.9218	-1.41299	100	0.157932	64	0.24	36.9218	-1.41299
1	2	11	Molecular Networks GmbH and Altamira LLC	37	ChemTunes•ToxGPS Ames (original)	74.3	0.48	55.6219	2.70496	96.2	-0.303543	71.7071	0.417198	50.4913	1.62174
1	2	11	Molecular Networks GmbH and Altamira LLC	38	ChemTunes•ToxGPS Ames (enhanced)_1	75.2	0.42	51.7086	2.12685	92.7	-0.379472	72.1805	0.346865	45.7339	0.865406
1	2	12	Simulations Plus, Inc	39	MUT_Risk-0_2	68	0.27	39.5407	-0.568764	89.9	-0.41884	64.7593	0.191507	33.1282	-1.92261
1	3	1	Lhasa Limited	40	Derek Nexus v. 5.0.1	69	0.32	42.8352	0.114758	100	0.157932	69	0.32	42.8352	0.114758
1	3	1	Lhasa Limited	41	Sarah Nexus v. 2.0.1 (model v. 1.1.19)	63.2	0.22	33.9972	-1.84918	80.2	-0.506662	59.4658	0.129555	26.6084	-3.40917
1	3	1	Lhasa Limited	42	Sarah research prottype prediction	72.4	0.34	44.6572	0.766656	67.7	-0.580989	68.2482	0.23944	36.442	-0.967801
1	3	1	Lhasa Limited	43	Sarah Nexus v. 2.0.1 (model v. 1.1.19)+ NIHS1 & NIHS2	69.3	0.3	40.5549	-0.149133	79.5	-0.511543	65.5384	0.208891	33.1118	-1.72058
1	3	2	MultiCASE Inc	44	Statistical approach; SALM/ECOLI consensus	71.7	0.44	50.7992	1.79356	85.9	-0.461024	68.2223	0.355766	43.9178	0.340693
1	3	2	MultiCASE Inc	45	RULE BASED (GT_EXPERT)	70	0.31	42.5412	0.141361	86.4	-0.456352	66.5485	0.226402	35.7117	-1.30054
1	3	3	Leadscope Inc	46	Statistical-based QSAR (rebuild II)	71.6	0.36	45.1967	0.8466	87.3	-0.44757	68.1979	0.277597	38.4648	-0.574686
1	3	3	Leadscope Inc	47	Rule-based (alerts; Bacterial mutagenicity v2)	71.3	0.38	46.8281	1.06316	88.4	-0.436095	67.9623	0.299159	40.2238	-0.331189
1	3	4	Istituto di Ricerche Farmacologiche Mario Negri IRCCS	48	CAESAR (training set based on Katius et al.)_3	67.3	0.25	36.9256	-0.970984	100	0.157932	67.3	0.25	36.9256	-0.970984
1	3	4	Istituto di Ricerche Farmacologiche Mario Negri IRCCS	49	SARPY (training set based on Katius et al.)_2	62	0.17	31.65	-2.48637	100	0.157932	62	0.17	31.65	-2.48637
1	3	4	Istituto di Ricerche Farmacologiche Mario Negri IRCCS	50	KNN batch (training set based on Hansen et al.+ Phase I & II)	62.4	0.28	36.6029	-1.35507	92.9	-0.376163	59.3991	0.207315	30.665	-2.60874
1	3	5	LMC-Bourgas University	51	TIMES AMES mutagenicity v.14.14. (In domain TIMES model)	67.2	0.32	43.3929	-0.0495719	9.7	-0.980341	60.8044	0.165093	30.7378	-2.72142
1	3	5	LMC-Bourgas University	52	TIMES AMES mutagenicity v.14.14. (Including out of domain)	64.1	0.23	35.567	-1.56629	99.9	0.0522361	63.5061	0.215616	34.3919	-1.81439
1	3	6	Istituto Superiore di Sanita	53	ToxTree 2.6.6_3	65.1	0.22	35.1456	-1.54899	100	0.157932	65.1	0.22	35.1456	-1.54899
1	3	8	Swedish Toxicology Science Research Center	54	SwetoxAZAMES v2	74.4	0.43	51.4597	2.08342	91.2	-0.401964	71.2541	0.353804	45.2349	0.769186
1	3	9	Fujitsu Kyushu Systems Limited	55	ADMEWORKS AMESver7.1.0	67.1	0.31	41.1926	-0.287341	74.5	-0.543399	63.1594	0.214556	33.3953	-1.93356
1	3	10	IdeaConsult Ltd.	56	Ambit consensus model_3	70.1	0.32	43.1027	0.259565	99.1	-0.145889	68.3929	0.278653	39.7248	-0.453589
1	3	11	Molecular Networks GmbH and Altamira LLC	57	ChemTunes•ToxGPS Ames (enhanced)_2	74	0.39	48.1749	1.5348	95.4	-0.32541	71.2842	0.324222	42.8011	0.400256
1	3	12	Simulations Plus, Inc	58	MUT_Risk-8.5	66.8	0.25	37.6219	-0.977136	96.4	-0.2974	64.2416	0.188034	32.5596	-2.04593
2	-	13	Shanghai Institute of Organic Chemistry, Chinese Academy of Sciences	59	CISOC-PSMT (SIOC, CAS, China)	66.4107	0.26603	39.2581	-0.79654	99.3077	-0.118673	64.8565	0.228387	36.1829	-1.44581
2	-	14	Altox Ltd.	60	GeneTox-iS - AbF (Alerts by Fragmentation) model 2.0	67.5126	0.260409	38.5482	-0.759848	100	0.157932	67.5126	0.260409	38.5482	-0.759848
2	-	14	Altox Ltd.	61	GeneTox-iS - Statistical model 1_v.2.0	63.5836	0.247183	37.0093	-1.40672	100	0.157932	63.5836	0.247183	37.0093	-1.40672
2	-	14	Altox Ltd.	62	GeneTox-iS - Statistical model 2_v.1.8	64.5469	0.286023	39.4191	-0.865421	100	0.157932	64.5469	0.286023	39.4191	-0.865421
2	-	14	Altox Ltd.	63	GeneTox-iS - Prototype - Decision tree core v.1.0	72.5576	0.404418	50	1.5986	77.8477	-0.522607	68.7338	0.311803	42.4339	0.00118657
2	-	15	MN-AM	64	ChemTunes.ToxGPS Ames NIHS_v2	78.4606	0.454744	53.7786	2.87805	80.9314	-0.501425	74.7559	0.365012	46.4479	1.33035
2	-	16	Instem	65	Leadscope 2nd QSAR Challenge Consensus Model	73.6789	0.402328	49.7391	1.69354	97.9232	-0.235901	71.4661	0.348732	45.3606	0.769096
2	-	16	Instem	66	Leadscope Genetox Alerts	72.3263	0.434612	51.6279	1.88988	93.2662	-0.369878	69.3607	0.362783	45.7598	0.650955
2	-	4	Istituto di Ricerche Farmacologiche Mario Negri IRCCS	67	Mutagenicity (Ames test) CONSENSUS model version 1.0.3	66.3536	0.248755	37.8523	-1.01937	99.8741	0.0358529	65.6676	0.232141	36.4951	-1.30593
2	-	4	Istituto di Ricerche Farmacologiche Mario Negri IRCCS	68	Mutagenicity (Ames test) CONSENSUS model (18k) version 0.9.1	67.1259	0.336143	43.659	0.0677192	99.8741	0.0358529	66.44	0.31953	42.3018	-0.218836
2	-	4	Istituto di Ricerche Farmacologiche Mario Negri IRCCS	69	NCSTOXVega-0.18 version 0.18	68.1464	0.280289	40.2219	-0.434635	99.9371	0.0809281	67.7137	0.269809	39.3658	-0.615386
2	-	10	IdeaConsult Ltd.	70	AMBIT DeepN v4.85	65.5699	0.312118	40.7713	-0.478403	82.1901	-0.49205	61.9178	0.223662	33.545	-2.0041
2	-	10	IdeaConsult Ltd.	71	AMBIT WideN v3.85	66.924	0.306337	41.9802	-0.274048	93.2662	-0.369878	63.9584	0.234507	36.1121	-1.51297
2	-	10	IdeaConsult Ltd.	72	AMBIT GT v2.0	62.4875	0.271282	36.7442	-1.39221	100	0.157932	62.4875	0.271282	36.7442	-1.39221
2	-	2	MultiCASE Inc	73	PHARM_BMUT model version(1.8.0.0.17691.350)	71.1531	0.415783	49.7409	1.49459	86.7841	-0.452665	67.7224	0.332687	42.9524	0.0613414
2	-	2	MultiCASE Inc	74	GT_EXPERT model version(1.8.0.1.16392.500)	74.0889	0.418945	50.9728	1.93966	92.3851	-0.384519	71.041	0.345123	44.9419	0.666374
2	-	2	MultiCASE Inc	75	Deep LM model version(1)	65.3881	0.308953	40.7407	-0.522183	95.4059	-0.325262	62.6732	0.243195	35.3687	-1.65638
2	-	1	Lhasa Limited	76	Derek Nexus v.6.0.1	72.1199	0.418903	50.9881	1.71623	100	0.157932	72.1199	0.418903	50.9881	1.71623
2	-	1	Lhasa Limited	77	Sarah Nexus v.3.0.1	67.8039	0.280549	40.3604	-0.461821	80.1762	-0.50683	64.0688	0.190082	32.9697	-2.02221
2	-	1	Lhasa Limited	78	Sarah Nexus v.3.0.1 with 2068 NIHS chemicals	68.9629	0.293473	40.9894	-0.198819	80.4279	-0.505046	65.2378	0.203248	33.6185	-1.75502
2	-	1	Lhasa Limited	79	Sarah Nexus v.3.0.1 with 12040 NIHS chemicals	62.1625	0.308688	36.7601	-1.18172	91.1265	-0.402976	59.011	0.232354	30.5241	-2.49833
2	-	6	Istituto Superiore di Sanita	80	in vitro Mutagenicity (Ames test) by ISS implemented in Toxtree 2.6.6	65.8596	0.242901	37.5	-1.13989	100	0.157932	65.8596	0.242901	37.5	-1.13989
2	-	6	Istituto Superiore di Sanita	81	in vitro Mutagenicity (Ames test) by ISS- modified2020	62.7902	0.208236	34.7826	-1.91603	100	0.157932	62.7902	0.208236	34.7826	-1.91603
2	-	17	Gifu University	82	xenoBiotic 0.9q	60.2828	0.303117	33.4347	-1.67513	98.7413	-0.181451	58.3759	0.25693	29.6614	-2.47176
2	-	18	Massachusetts Institute of Technology	83	Chemprop	64.2539	0.3752	41.989	-0.124034	100	0.157932	64.2539	0.3752	41.989	-0.124034
2	-	12	Simulations Plus, Inc	84	S+MUT_NIHS_ABC	71.1477	0.316481	42.1053	0.282959	94.1473	-0.353368	68.2749	0.246898	36.4207	-0.917207
2	-	12	Simulations Plus, Inc	85	S+MUT_NIHS_AC	67.7554	0.282823	40.0657	-0.473876	94.1473	-0.353368	64.8825	0.21324	34.3811	-1.67404
2	-	12	Simulations Plus, Inc	86	S+MUT_NIHS	71.2242	0.316796	42.0904	0.292659	94.1473	-0.353368	68.3513	0.247214	36.4059	-0.907507
2	-	19	Chemotargets	87	CHMT_GBoostSC	64.2613	0.351144	41.3613	-0.327411	100	0.157932	64.2613	0.351144	41.3613	-0.327411
2	-	20	LMC - Bourgas University	88	TIMES_AMES 17.17.3 (in domain TIMES model)	73.2981	0.422813	51.087	1.88339	35.9346	-0.735121	68.2803	0.301278	41.1582	-0.212859
2	-	20	LMC - Bourgas University	89	TIMES_AMES 17.17.3 (including out of domain)	67.5408	0.300147	41.7657	-0.260209	99.8112	0.00385007	66.6751	0.279178	40.0526	-0.621884
2	-	21	The University of Sydney	90	SpicyMoTE	64.0371	0.315773	40	-0.685191	100	0.157932	64.0371	0.315773	40	-0.685191
2	-	21	The University of Sydney	91	RFRS	61.8445	0.271842	35.8722	-1.52537	100	0.157932	61.8445	0.271842	35.8722	-1.52537
2	-	21	The University of Sydney	92	Hybrid DNN-RF classifier	51.0495	0.086217	4.83871	-6.24139	100	0.157932	51.0495	0.086217	4.83871	-6.24139
2	-	21	The University of Sydney	93	GreedyMBAK	70.0822	0.311071	42.4581	0.151708	100	0.157932	70.0822	0.311071	42.4581	0.151708
2	-	21	The University of Sydney	94	DRSpicySTiM-Ensemble	63.6577	0.295398	38.8889	-0.943648	100	0.157932	63.6577	0.295398	38.8889	-0.943648
2	-	22	Meiji Pharmaceutical University	95	MMI-STK2	72.0386	0.429094	51.6393	1.8216	100	0.157932	72.0386	0.429094	51.6393	1.8216
2	-	22	Meiji Pharmaceutical University	96	MMI-VOTE2	71.9647	0.426287	51.4286	1.77932	100	0.157932	71.9647	0.426287	51.4286	1.77932
2	-	22	Meiji Pharmaceutical University	97	MMI-STK1	76.9187	0.44261	52.8481	2.55463	100	0.157932	76.9187	0.44261	52.8481	2.55463
2	-	22	Meiji Pharmaceutical University	98	MMI-VOTE1	77.0369	0.438443	52.3883	2.50711	100	0.157932	77.0369	0.438443	52.3883	2.50711
2	-	23	Liverpool John Moores University	99	RF model1	64.8715	0.211642	34.585	-1.67095	99.4965	-0.0865219	63.498	0.178374	31.8672	-2.24476
2	-	23	Liverpool John Moores University	100	DL	49.636	-0.00640187	16.7558	-6.14293	99.4965	-0.0865219	48.2624	-0.0396696	14.038	-6.71673
2	-	23	Liverpool John Moores University	101	RF model2	68.6703	0.282734	40.2649	-0.355721	99.4965	-0.0865219	67.2968	0.249466	37.5471	-0.929524
2	-	24	Evergreen AI, Inc	102	Avalon	71.9301	0.384939	48.4956	1.2891	100	0.157932	71.9301	0.384939	48.4956	1.2891
2	-	25	Politecnico di Milano	103	GCN	65.8183	0.383642	44.4444	0.288876	100	0.157932	65.8183	0.383642	44.4444	0.288876
2	-	25	Politecnico di Milano	104	BGCN (Bayesian GCN)	54.4565	0.199918	17.3285	-4.19336	100	0.157932	54.4565	0.199918	17.3285	-4.19336
2	-	26	NCTR/FDA	105	DeepAmes	69.1302	0.383972	47.619	0.899884	97.1051	-0.272818	66.71	0.325351	42.83	-0.111209
2	-	26	NCTR/FDA	106	Decision Forest	59.164	0.177012	30.426	-2.85251	100	0.157932	59.164	0.177012	30.426	-2.85251
2	-	27	NIBIOHN	107	GNN(kMoL)_bestbalanced (the best model)	67.2274	0.407173	46.9697	0.788568	100	0.157932	67.2274	0.407173	46.9697	0.788568
2	-	27	NIBIOHN	108	GNN(kMoL)_bestF1	69.4643	0.429614	50.1182	1.42083	100	0.157932	69.4643	0.429614	50.1182	1.42083
2	-	27	NIBIOHN	109	GNN(kMoL)_recallweighted	71.592	0.309576	40.8163	0.194056	100	0.157932	71.592	0.309576	40.8163	0.194056
